# Supplementary material
Source: Springer Nature journal article supplement (https://www.springermedizin.de/resource/supplementary/12876_2010_515_MOESM5_ESM.pdf/9436890)

**H&E****IQGAP1****IQGAP2****Normal**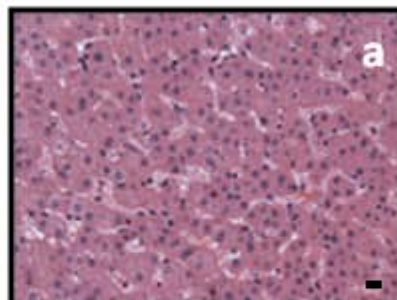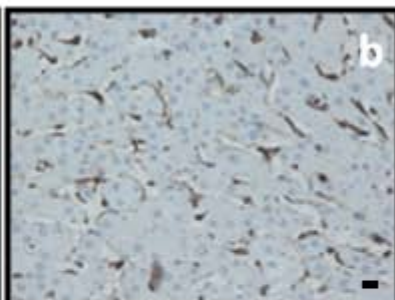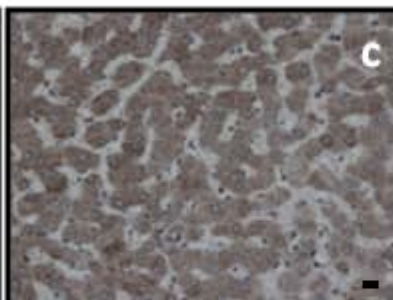**Adenoma**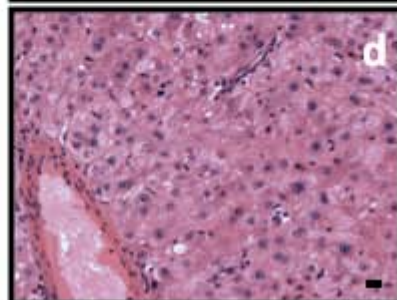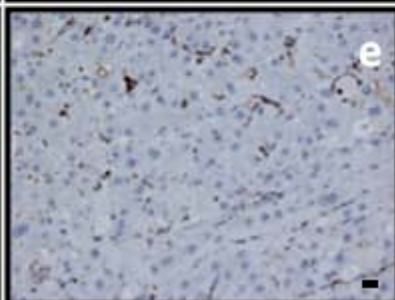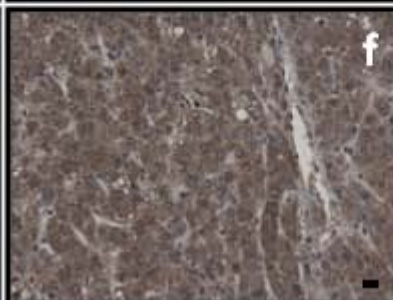**Cirrhosis**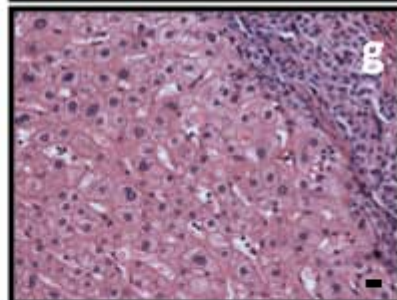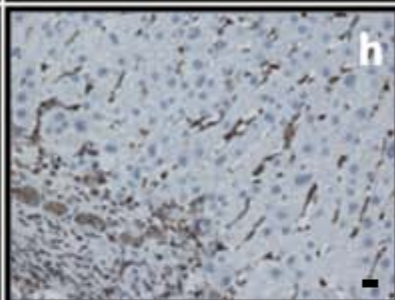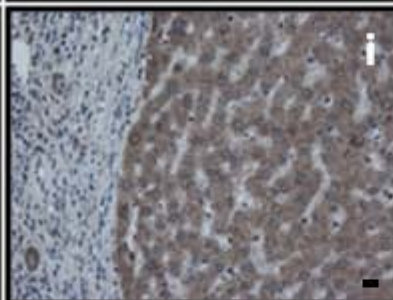**Carcinoma**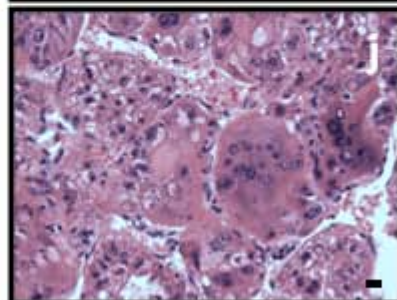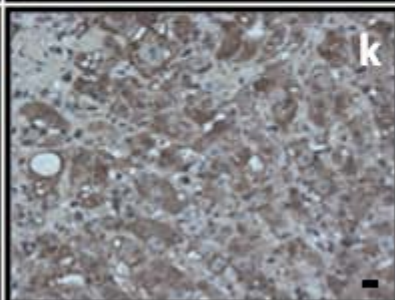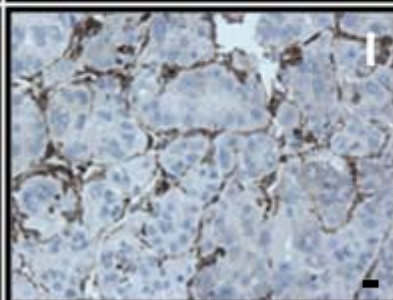

Supplement: MOESM5 [file 9436890]
